# Supplementary material
Source: PubMed Central journal article supplement (PMC5038281)
Supplement: AAC.00463-16_zac010165568so1.pdf [file AAC.00463-16_zac010165568so1.pdf]

**FIG S1**

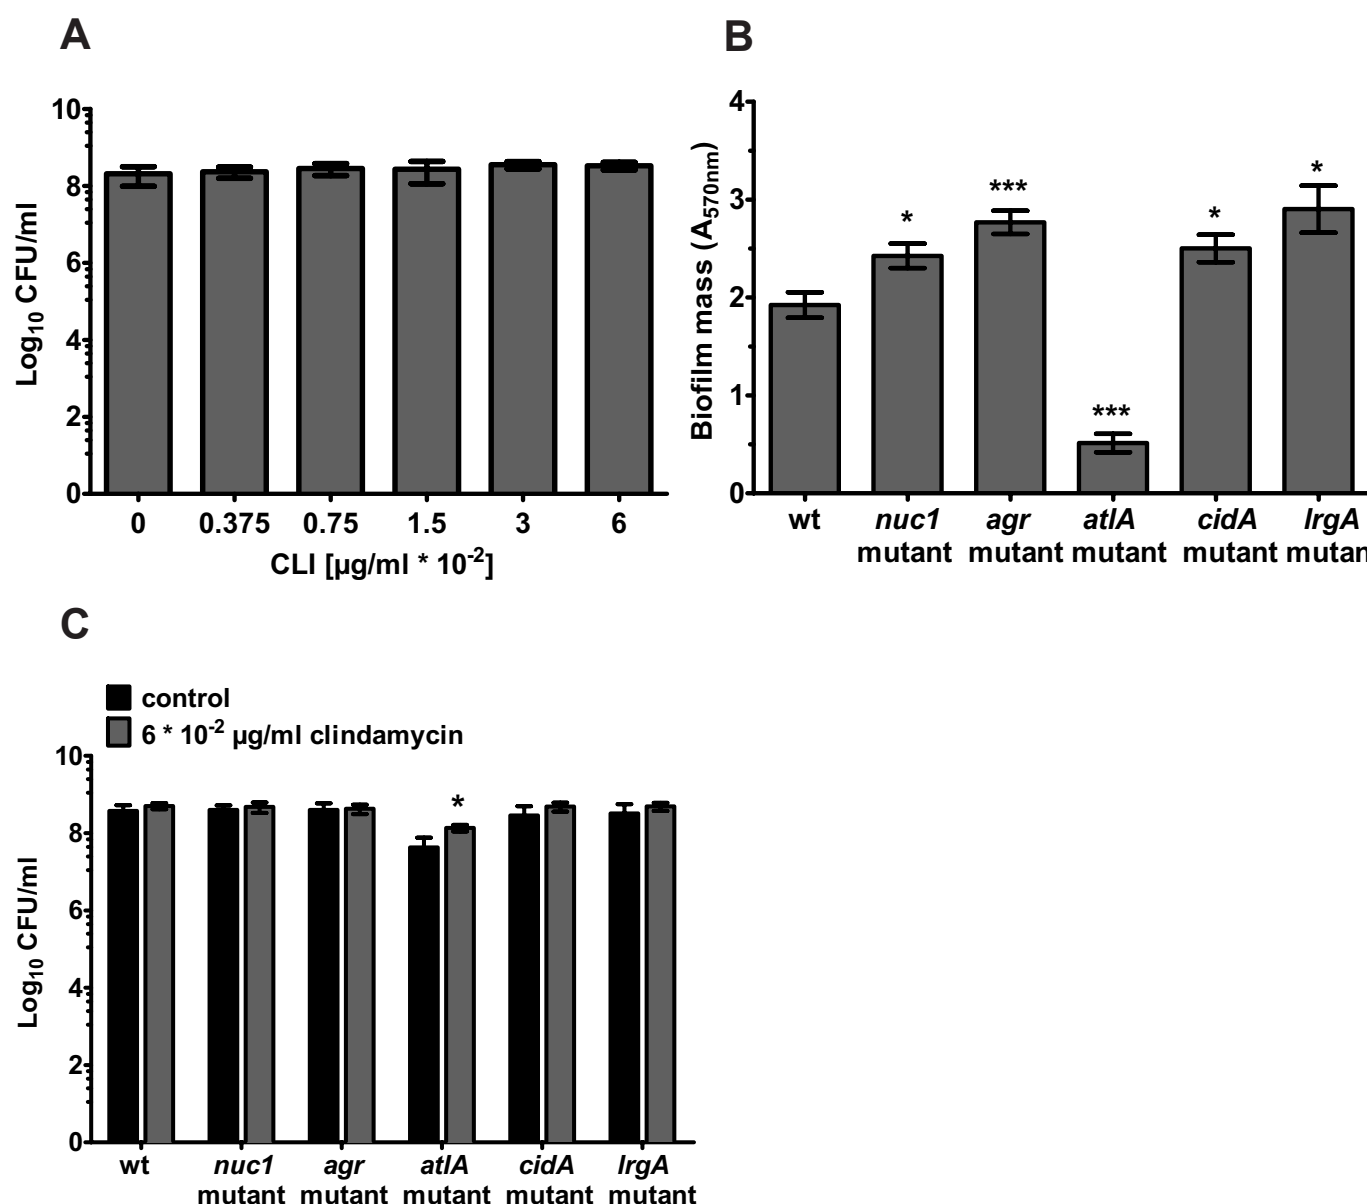

**FIG S1:** Viable bacteria counts and biofilm formation of LAC wt and isogenic mutants. A) CFU counts ( $\text{Log}_{10} \text{ CFU/ml}$ ) of the LAC wt strain in the absence and presence of different concentrations of clindamycin after 18 h of biofilm growth. No significant difference is visible between the samples incubated with or without subinhibitory concentrations of clindamycin. Results presented are average data from at least three independent replicates  $\pm$  SEM ( $P = 0.2982$ , not significant; Kruskal-Wallis test followed by post hoc Dunn's multiple comparisons). B) Biofilm mass quantification with crystal violet of *S. aureus* LAC wt and all mutants used in this study after 18 h of static incubation in 96-well plates. Absorbance was measured at 570 nm ( $A_{570\text{nm}}$ ). All results presented are average data from at least three replicates  $\pm$  SEM. An asterisk on top of the respective mutant data set indicates a significant difference to the LAC wt (\* $P < 0.05$ , \*\*\* $P < 0.001$ , Mann-Whitney U test). C) CFU counts ( $\text{Log}_{10} \text{ CFU/ml}$ ) of the LAC wt and all mutants used in this study in the absence and presence of clindamycin (0.06  $\mu\text{g/ml}$ ) after 18 h of biofilm growth. Results presented are average data from at least three independent replicates  $\pm$  SEM. An asterisk on top of the bar indicates a significant difference to the control without clindamycin (\* $P < 0.05$ , Mann-Whitney U test).

**FIG S2**

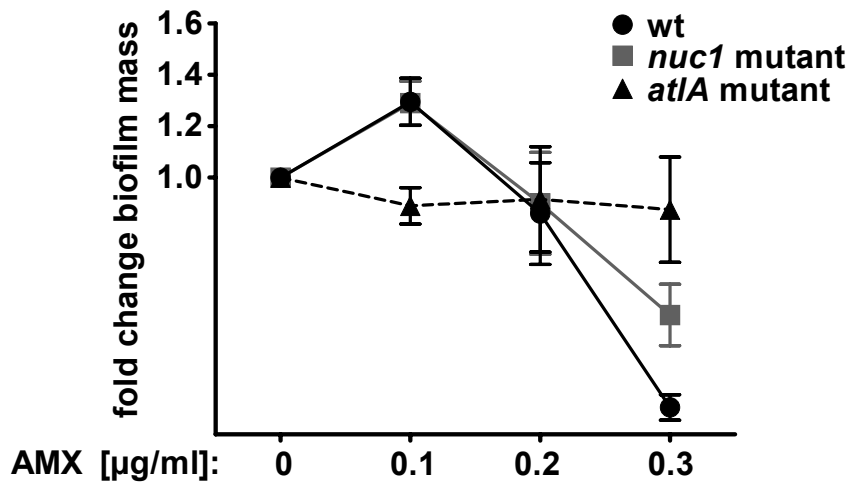

**FIG S2:** Modulation of biofilm formation in *S. aureus* LAC in response to subinhibitory concentrations of amoxicillin (AMX). LAC wt and the *nuc1* mutant showed an increase of biofilm formation in response to low-dose amoxicillin. No induction of biofilm formation was observed in the *atlA* mutant background. The biofilm mass was quantified with crystal violet after 18 h of static incubation. Biofilm mass without amoxicillin was set to 1 and fold changes are presented. Results presented are average data from two replicates  $\pm$  SD.

**FIG S3**

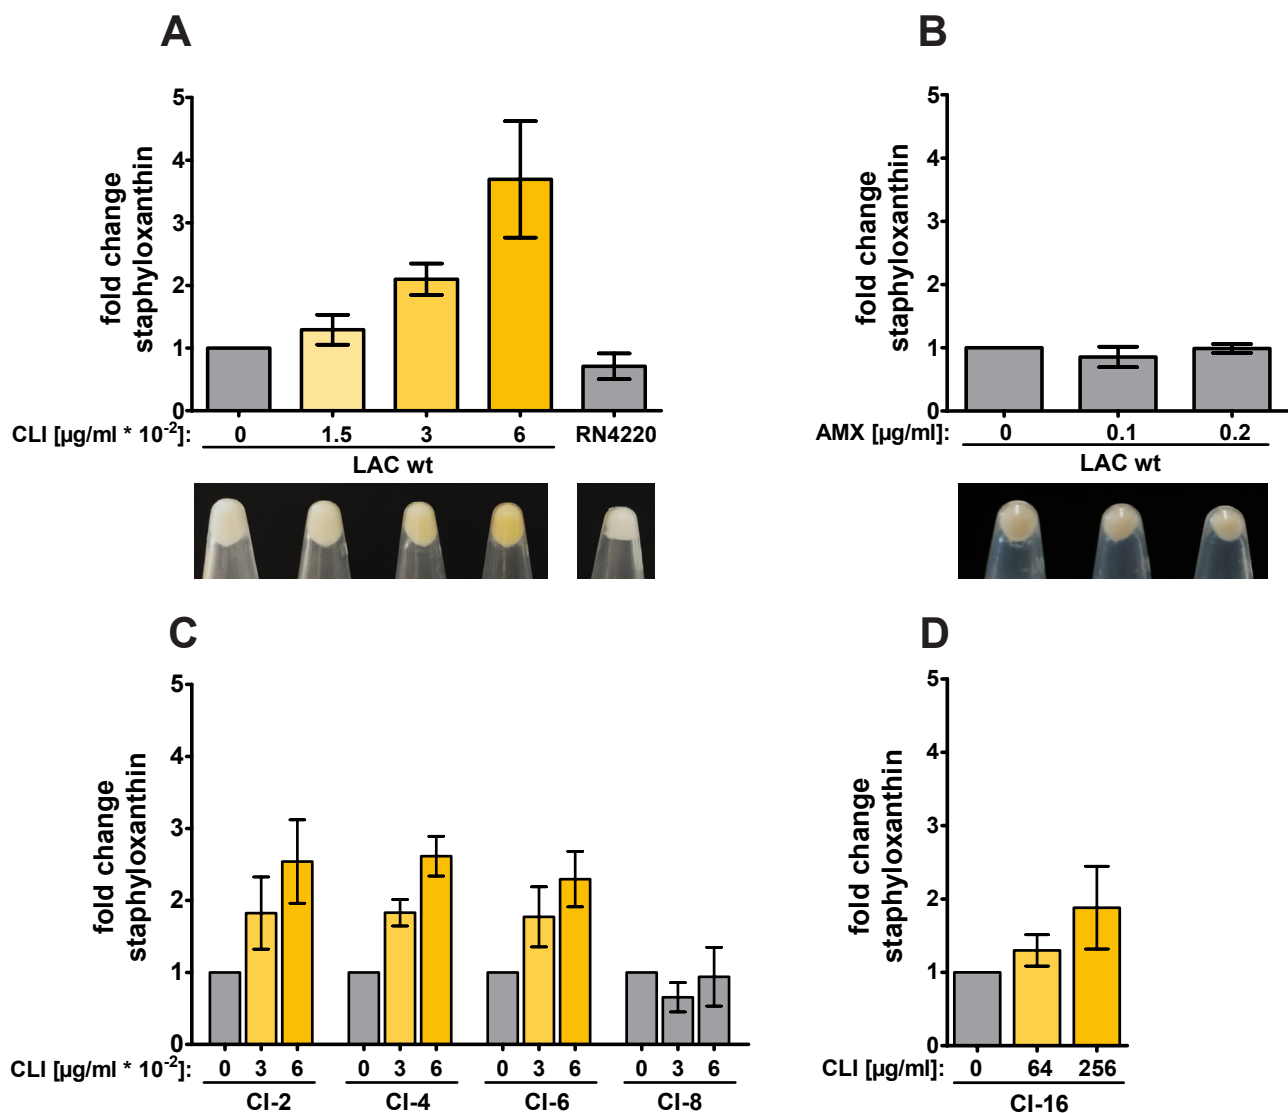

**FIG S3:** Alteration of staphyloxanthin production by subinhibitory antibiotic concentrations. Quantification of staphyloxanthin production in the presence and absence of subinhibitory concentrations of clindamycin (CLI; A, C and D) and amoxicillin (AMX; B). Extracted staphyloxanthin from LAC wt (A and B), RN4220 (A), clindamycin-sensitive clinical isolates (C) and a clindamycin-resistant clinical isolate (D) was measured by spectrophotometry. Strains grown without antibiotics were set to 1 and fold changes are presented. Representative pellets of bacterial cultures used for staphyloxanthin extraction are shown below the bar graph (A and B). Results presented are average data from at least three (A, means  $\pm$  SEM) or two replicates (B, C, D, means  $\pm$  SD).

**FIG S4**

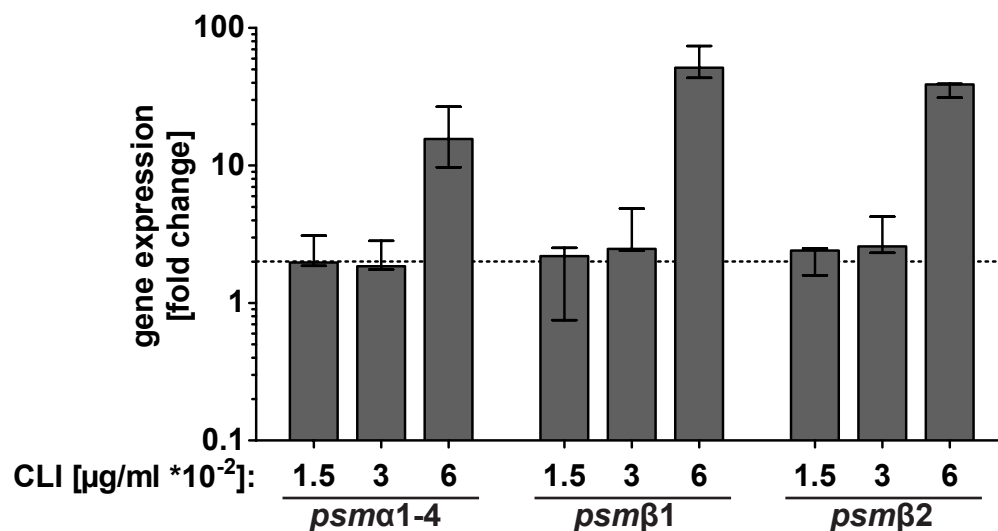

**FIG S4:** Overexpression of *psm* genes in *S. aureus atlA* mutant biofilms in response to clindamycin. Relative transcript levels of *psm* genes derived from LAC *atlA* mutant biofilm mass after 18 h with and without clindamycin determined by qRT-PCR. Fold change ratios were calculated by normalizing complementary DNA levels of the gene of interest against the housekeeping gene *gyrB*. Data are presented as fold change compared to biofilms grown without clindamycin (set to 1) and error bars indicate interquartile range of at least three independent experiments. The dotted line indicates a 2-fold upregulation.

**FIG S5**

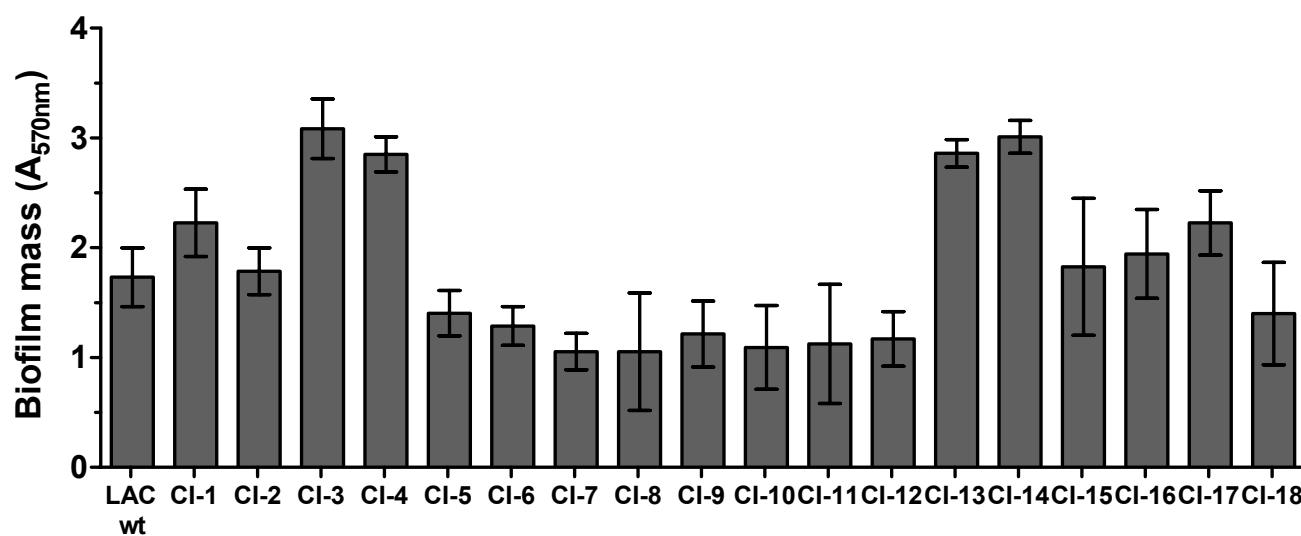

**FIG S5:** Biofilm formation of *S. aureus* LAC wt and clinical isolates used in this study. Biofilm mass quantification with crystal violet of *S. aureus* clinical isolates after 18 h of static incubation in 96-well plates. Absorbance was measured at 570 nm (A<sub>570<sub>nm</sub></sub>). All results presented are average data from at least three replicates  $\pm$  SEM.

**Table S1 – Strains used in this study**

| Strains            | Relevant characteristics                                                                                                         | Reference/ Source |
|--------------------|----------------------------------------------------------------------------------------------------------------------------------|-------------------|
| LAC wt             | CA-MRSA, pulsed-field type USA300 (ST8), Erm <sup>s</sup>                                                                        | (1)               |
| <i>nuc1</i> mutant | LAC <i>nuc1</i> deficient, Erm <sup>s</sup>                                                                                      | (2)               |
| RN4220             | Restriction-deficient derivative of NCTC8325-4,<br><i>agr</i> <sup>-</sup> , <i>tcaR</i> <sup>-</sup> , <i>rsbU</i> <sup>-</sup> | (3)               |
| RN6911             | NCTC8325-4 <i>agr::tet(M)</i> , Tc <sup>r</sup>                                                                                  | (4)               |
| <i>agr</i> mutant  | LAC <i>agr::tet(M)</i> , Tc <sup>r</sup>                                                                                         | This study        |
| RN4220 pTnT        | RN4220 carrying pTnT, Amp <sup>r</sup> , Cm <sup>r</sup>                                                                         | (5)               |
| NE1438             | JE2 <i>lrgA</i> transposon mutant, Erm <sup>r</sup>                                                                              | (6)               |
| NE1692             | JE2 <i>cidA</i> transposon mutant, Erm <sup>r</sup>                                                                              | (6)               |
| NE460              | JE2 <i>atIA</i> transposon mutant, Erm <sup>r</sup>                                                                              | (6)               |
| <i>lrgA</i> mutant | LAC <i>lrgA</i> transposon mutant, Erm <sup>s</sup>                                                                              | This study        |
| <i>cidA</i> mutant | LAC <i>cidA</i> transposon mutant, Erm <sup>s</sup>                                                                              | This study        |
| <i>atIA</i> mutant | LAC <i>atIA</i> transposon mutant, Erm <sup>s</sup>                                                                              | This study        |

Erm<sup>s</sup> = erythromycin sensitive, Tc<sup>r</sup> = tetracycline resistant, Erm<sup>r</sup> = erythromycin resistant,  
Amp<sup>r</sup> = ampicillin resistant, Cm<sup>r</sup> = chloramphenicol resistant

## References

1. **Boles BR, Thoendel M, Roth AJ, Horswill AR.** 2010. Identification of genes involved in polysaccharide-independent *Staphylococcus aureus* biofilm formation. *PLoS One* **5**:e10146.
2. **Kiedrowski MR, Kavanaugh JS, Malone CL, Mootz JM, Voyich JM, Smeltzer MS, Bayles KW, Horswill AR.** 2011. Nuclease modulates biofilm formation in community-associated methicillin-resistant *Staphylococcus aureus*. *PLoS One* **6**:e26714.
3. **Kreiswirth BN, Lofdahl S, Betley MJ, O'Reilly M, Schlievert PM, Bergdoll MS, Novick RP.** 1983. The toxic shock syndrome exotoxin structural gene is not detectably transmitted by a prophage. *Nature* **305**:709-712.
4. **Novick RP, Ross HF, Projan SJ, Kornblum J, Kreiswirth B, Moghazeh S.** 1993. Synthesis of staphylococcal virulence factors is controlled by a regulatory RNA molecule. *EMBO J* **12**:3967-3975.
5. **Bose JL, Fey PD, Bayles KW.** 2013. Genetic tools to enhance the study of gene function and regulation in *Staphylococcus aureus*. *Appl Environ Microbiol* **79**:2218-2224.
6. **Fey PD, Endres JL, Yajjala VK, Widhelm TJ, Boissy RJ, Bose JL, Bayles KW.** 2013. A genetic resource for rapid and comprehensive phenotype screening of nonessential *Staphylococcus aureus* genes. *MBio* **4**:e00537-00512.

**Table S2 – Primers used in this study**

| Primer     | Sequence (5' - 3')                | Application            | Reference/ Source |
|------------|-----------------------------------|------------------------|-------------------|
| Upstream   | CTCGATTCTATTAACAAGGG              | PCR                    | (1)               |
| Buster     | GCTTTTCTAAATGTTTTTAAGTAAATCAAGTAC | PCR                    | (1)               |
| cidA       | ATATTGGCACAGAAATTCAA              | PCR                    | This study        |
| lrgA       | ATCAAAACCAGCACACTTT               | PCR/sequencing         | This study        |
| altA       | ATCGTACACACACGACTA                | PCR                    | This study        |
| agrlocus-F | AACTCAGTAAGAACCCATTTTCG           | PCR/sequencing         | This study        |
| agrlocus-R | AGTTTGCCAACATTACAAGAGG            | PCR/sequencing         | This study        |
| cidASeq1   | AACCTGAAGATAATGCAACGA             | sequencing             | This study        |
| cidASeq2   | CCGGCAGTATTGTTGGTCTA              | sequencing             | This study        |
| atlASeq1   | TGTTGTTGGTTTTGATGGTG              | sequencing             | This study        |
| atlASeq2   | TTTGACGTTCAATGAATAA               | sequencing             | This study        |
| gyrB.MB-F2 | CGCAGGCGATTTTACCATTA              | qRT PCR                | (2)               |
| gyrB.MB-R2 | GCTTTCGCTAGATCAAAGTCG             | qRT PCR                | (2)               |
| nuc1-F     | TGAAGCAAGTGCATTTACGA              | qRT PCR                | (3)               |
| nuc1-R     | CCAAGCCTTGACGAACTAAA              | qRT PCR                | (3)               |
| atlA-F     | AACAAGTTGCTGGTAGTGTG              | qRT PCR                | This study        |
| atlA-R     | CCATTCACAGAGCCATATAA              | qRT PCR                | This study        |
| cidA-F     | CGCAGTCATTATCATAGGAA              | qRT PCR                | This study        |
| cidA-R     | TAAGCGTCTACACCTTTACG              | qRT PCR                | This study        |
| lrgA-F     | TATGCCTGCATCAGTAATCG              | qRT PCR                | This study        |
| lrgA-R     | CGGCTGGTACGAAGAGTAAG              | PCR/qRT PCR/sequencing | This study        |
| agrA-F     | CAGACTCATTGCCCATTTA               | qRT PCR                | This study        |
| agrA-R     | TTGACGACAAAGCTATTATGAC            | qRT PCR                | This study        |

| Primer             | Sequence (5' - 3')      | Application       | Reference/ Source |
|--------------------|-------------------------|-------------------|-------------------|
| sigB-F             | ATGGAAATGGGACAAAGTTA    | qRT PCR           | This study        |
| sigB-R             | TCTTGTTGCCCCATAATATC    | qRT PCR           | This study        |
| fnbA-F             | ATAGCGGAGATCAAAGACAA    | qRT PCR           | This study        |
| fnbA-R             | CTTACTTTCTGATGCCGTTT    | qRT PCR           | This study        |
| fnbB-F             | CTCAACCAAGTAACGTCTCA    | qRT PCR           | This study        |
| fnbB-R             | CATCTGTACCTGTCGCTTTA    | qRT PCR           | This study        |
| psm $\beta$ 1-F    | TTAACGCAATTAAAGATACCG   | qRT PCR           | This study        |
| psm $\beta$ 1-R    | ACCTAATAAACCTACGCCATT   | qRT PCR           | This study        |
| psm $\beta$ 2-F    | CTGGACTAGCAGAAGCAATC    | qRT PCR           | This study        |
| psm $\beta$ 2-R    | GTAAACCCACACCGTTAGC     | qRT PCR           | This study        |
| psm $\alpha$ 1-4-F | AACGATCAACAACCTCATCACTA | qRT PCR           | This study        |
| psm $\alpha$ 1-4-R | TGTCGATAATTGCTTTGATG    | qRT PCR           | This study        |
| spa-1113f          | TAAAGACGATCCTTCGGTGAGC  | <i>spa</i> typing | (4)               |
| spa-1514r          | CAGCAGTAGTGCCGTTTGCTT   | <i>spa</i> typing | (4)               |

## References

1. **NTML.** on The Nebraska Transposon Mutant Library. <http://app1.unmc.edu/fgx/methods.html>. Accessed 2016.
2. **Seidl K, Chen L, Bayer AS, Hady WA, Kreiswirth BN, Xiong YQ.** 2011. Relationship of agr expression and function with virulence and vancomycin treatment outcomes in experimental endocarditis due to methicillin-resistant Staphylococcus aureus. Antimicrob Agents Chemother **55**:5631-5639.
3. **Schilcher K, Andreoni F, Uchiyama S, Ogawa T, Schuepbach RA, Zinkernagel AS.** 2014. Increased neutrophil extracellular trap-mediated Staphylococcus aureus clearance through inhibition of nuclease activity by clindamycin and immunoglobulin. J Infect Dis **210**:473-482.
4. **Shopsin B, Gomez M, Montgomery SO, Smith DH, Waddington M, Dodge DE, Bost DA, Riehman M, Naidich S, Kreiswirth BN.** 1999. Evaluation of protein A gene polymorphic region DNA sequencing for typing of Staphylococcus aureus strains. J Clin Microbiol **37**:3556-3563.

**Table S3 - Clinical isolates**

| <b>Strains</b>                 | <b>Site of isolation</b> | <b>Clinical presentation</b>                    | <b><i>spa</i> type</b> |
|--------------------------------|--------------------------|-------------------------------------------------|------------------------|
| MSSA clinical isolate CI-1     | tissue                   | necrotizing fasciitis                           | t4235                  |
| MSSA clinical isolate CI-2     | tissue                   | vascular prosthesis infection                   | t005                   |
| MSSA clinical isolate CI-3     | wound                    | panaritium                                      | t10973                 |
| MSSA clinical isolate CI-4     | bone                     | Brodie abscess                                  | t3613                  |
| MSSA clinical isolate CI-5     | aortic valve             | endocarditis                                    | t091                   |
| MRSA clinical isolate CI-6     | blood                    | bacteremia                                      | t002                   |
| MRSA clinical isolate CI-7     | blood                    | bacteremia                                      | t002                   |
| MRSA clinical isolate CI-8     | arthrocentesis           | knee prosthesis infection                       | t1183                  |
| MRSA clinical isolate CI-9     | pacemaker wires          | pacemaker endocarditis                          | t1036                  |
| MRSA clinical isolate CI-10    | breast implants          | breast implant infection                        | *                      |
| MRSA clinical isolate CI-11    | tissue                   | no information available                        | t021                   |
| MRSA clinical isolate CI-12    | puncture fluid           | hip prosthesis infection                        | t044                   |
| MRSA clinical isolate CI-13 ** | axilla                   | no information available                        | t032                   |
| MRSA clinical isolate CI-14 ** | nose                     | no information available                        | t032                   |
| MRSA clinical isolate CI-15 ** | urine                    | no information available                        | t586                   |
| MRSA clinical isolate CI-16 ** | abscess                  | skin and soft tissue infection                  | t008                   |
| MRSA clinical isolate CI-17 ** | wound                    | skin and soft tissue infection                  | t008                   |
| MRSA clinical isolate CI-18 ** | blood                    | central nervous system<br>(CNS) shunt infection | t586                   |

\* potential new *spa* type

\*\* clindamycin resistant >256 mg/L
